# Supplementary material for: Overcoming Immunological Challenges to Helper-Dependent Adenoviral Vector-Mediated Long-Term CFTR Expression in Mouse Airways
Source: MDPI journal article supplement (doi:10.3390/genes11050565), 2020-05-18
Supplement: s1 [file s1]

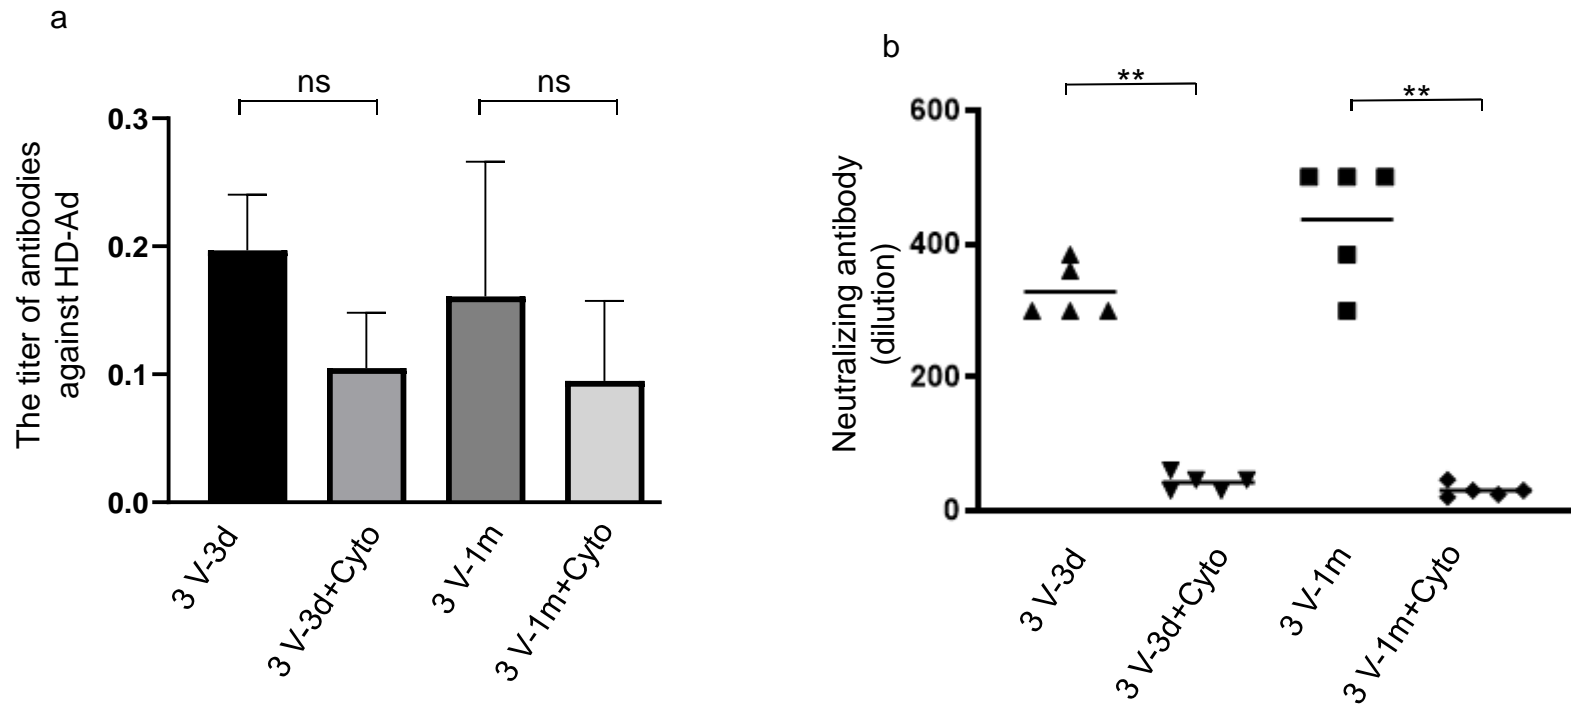

**Supplementary figure 1. Anti-adenoviral antibodies in mouse serum.** a) The total anti-Ad antibodies (IgA, IgE, IgGs, IgM) were detected with ELISA in all groups. Data were presented as mean  $\pm$  SD. b) Neutralizing antibody in mouse sera. n=5, #: p<0.05; \*\*: p<0.01.
